# Supplementary material for: Mononuclear copper(ii)–hydroperoxo complex derived from reaction of copper(i) complex with dioxygen as a model of DβM and PHM
Source: Royal Society of Chemistry journal article supplement (doi:10.1039/b609673e), 2006-01-01
Supplement: b609673e.pdf [file b609673e.pdf]

## Supporting Information for:

### Mononuclear copper(II)-hydroperoxo complex derived from reaction of copper(I) complex with dioxygen as a model of D $\beta$ M and PHM

Tatsuya Fujii,<sup>a</sup> Syuhei Yamaguchi,<sup>a</sup> Yasuhiro Funahashi,<sup>a</sup> Tomohiro Ozawa,<sup>a</sup> Takehiko Tosha,<sup>b</sup> Teizo Kitagawa,<sup>b</sup> and Hideki Masuda\*

<sup>a</sup>Department of Applied Chemistry, Nagoya Institute of Technology, Showa-ku, Nagoya 466-8555, Japan.  
Fax: +81-52-735-5209; Tel: +81-52-735-5228; \*E-mail: [masuda@ach.nitech.ac.jp](mailto:masuda@ach.nitech.ac.jp)

<sup>b</sup>Center of Integrative Bioscience, Okazaki National Research Institutes, Myodaiji, Okazaki 444-8585, Japan.

#### Contents:

- 1) Table with X-ray structure refinement parameters for complex **1**. **Table S1**
- 2) ESR spectrum of the reaction of **1** with O<sub>2</sub>. **Figure S1**
- 3) ESI-mass spectrum of the reaction of **1** with O<sub>2</sub>. **Figure S2**
- 4) rRaman spectra of the reaction of **1** with O<sub>2</sub>. **Figure S3**
- 5) rRaman comparison of the reaction of **1** + O<sub>2</sub> with the reaction of [Cu<sup>II</sup>(Hbppa)]<sup>+</sup> + H<sub>2</sub>O<sub>2</sub> system. **Figure S4**
- 6) UV-vis spectral change of the reaction of **1** with O<sub>2</sub> in the presence of large amount of DMPO. **Figure S5**
- 7) ESI-mass spectra of the reaction of **1** with O<sub>2</sub> in the presence of large amount of DMPO. **Figure S6**
- 8) Simulation spectrum of the reaction mixture after reaction of **1** with O<sub>2</sub>. **Figure S7**

**Table S1.** Crystallographic data and refinement parameters for  $[\text{Cu}^{\text{I}}(\text{H}_2\text{bppa})]\text{ClO}_4 \cdot 0.5\text{EtOH}$ 

| Complex                                      | $[\text{Cu}^{\text{I}}(\text{H}_2\text{bppa})]\text{ClO}_4 \cdot 0.5\text{EtOH}$ |
|----------------------------------------------|----------------------------------------------------------------------------------|
| Empirical Formula                            | $\text{C}_{29}\text{H}_{36}\text{ClCuN}_6\text{O}_{6.5}$                         |
| Formula Weight                               | 671.64                                                                           |
| Crystal Color                                | red, block                                                                       |
| Crystal Dimensions / mm                      | 0.20×0.20×0.10                                                                   |
| Crystal System                               | triclinic                                                                        |
| Space Group                                  | P-1 (#2)                                                                         |
| <i>a</i> / Å                                 | 9.973(5)                                                                         |
| <i>b</i> / Å                                 | 12.38(3)                                                                         |
| <i>c</i> / Å                                 | 14.08(3)                                                                         |
| $\alpha$ / deg                               | 112.72(13)                                                                       |
| $\beta$ / deg                                | 91.375(9)                                                                        |
| $\gamma$ / deg                               | 98.20(4)                                                                         |
| Cell Volume / Å <sup>3</sup>                 | 1581(5)                                                                          |
| Z value                                      | 2                                                                                |
| <i>D</i> <sub>calc</sub> / gcm <sup>-3</sup> | 1.413                                                                            |
| <i>F</i> (000)                               | 702.00                                                                           |
| Radiation                                    | Mo K <sub>α</sub> ( $\lambda$ = 0.71070 Å)                                       |
| Detector                                     | Rigaku/MSC mercury CCD                                                           |
| <i>T</i> / °C                                | -100.0                                                                           |
| 2 $\theta$ max / deg                         | 55.0                                                                             |
| No. of Reflections Measured                  | Total: 12632                                                                     |
| No. of Observations                          | 5318                                                                             |
| No. of Variables                             | 427                                                                              |
| Reflection/Parameter Ratio                   | 12.45                                                                            |
| <i>R</i> / <i>R</i> <sub>w</sub>             | 0.0597/0.1775                                                                    |
| G.O.F                                        | 1.001                                                                            |
| Max Shift/Error                              | 0.000                                                                            |

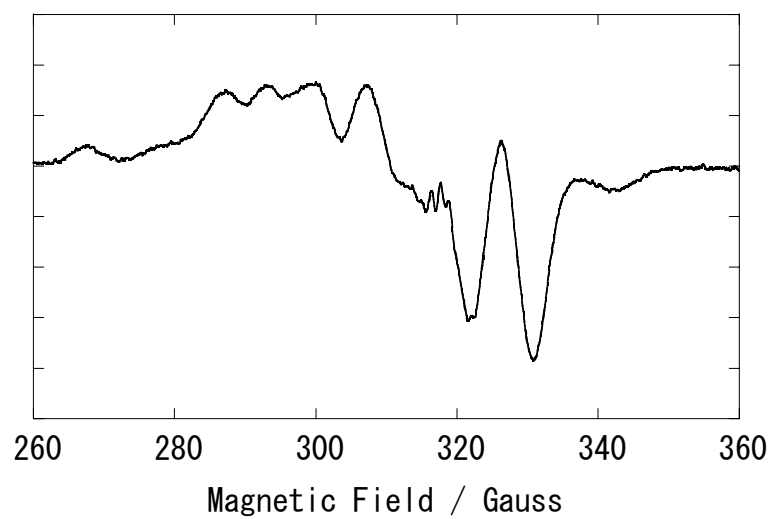

**Figure S1.** ESR spectrum of the reaction solution of **1** with O<sub>2</sub> in MeOH.

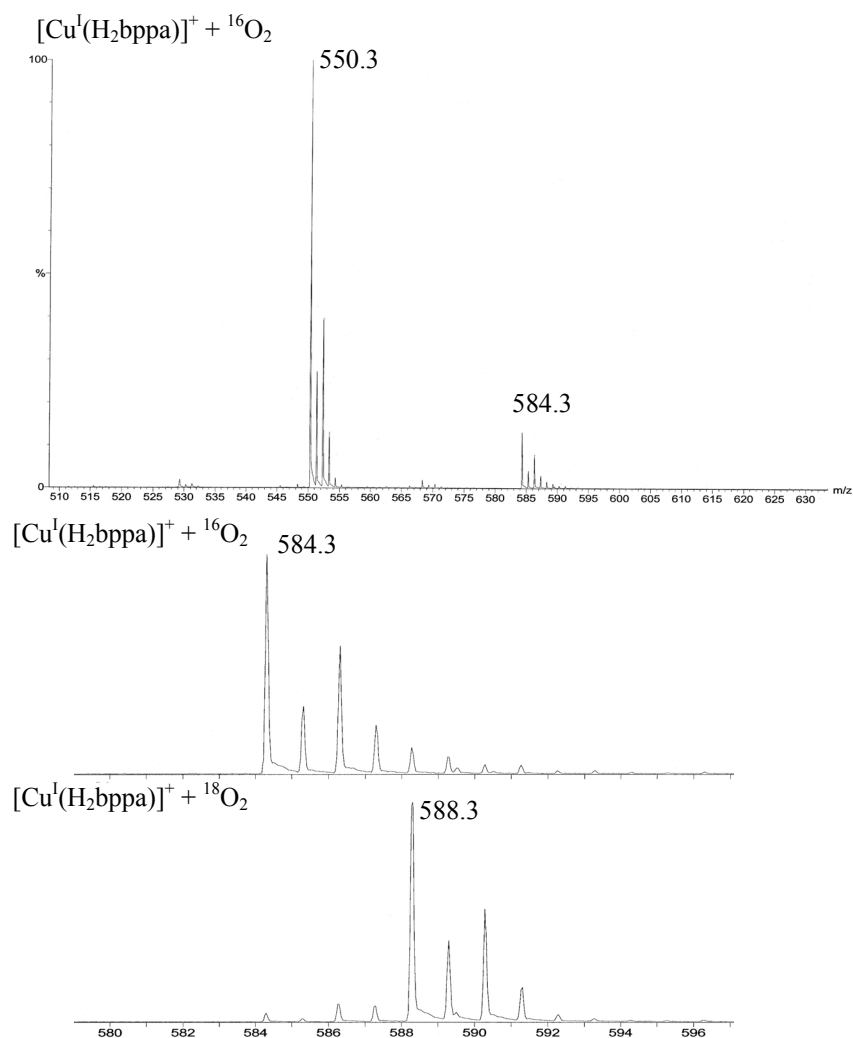

**Figure S2.** ESI-mass spectra of the reaction solution of **1** with  $\text{O}_2$  in acetone.

(top) reaction of **1** with  ${}^{16}\text{O}_2$

$m/z = 550.3 : [\text{Cu}^{\text{II}}(\text{Hbppa})]^+$ ,  $m/z = 584.3 : [\text{Cu}^{\text{II}}(\text{H}_2\text{bppa})({}^{16}\text{O}^{16}\text{OH})]^+$

(bottom) isotope shift of the reaction of **1** with  ${}^{18}\text{O}_2$

$m/z = 588.3 : [\text{Cu}^{\text{II}}(\text{H}_2\text{bppa})({}^{18}\text{O}^{18}\text{OH})]^+$

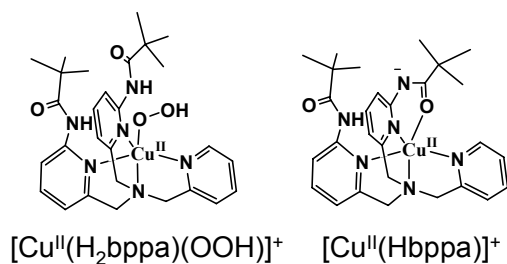

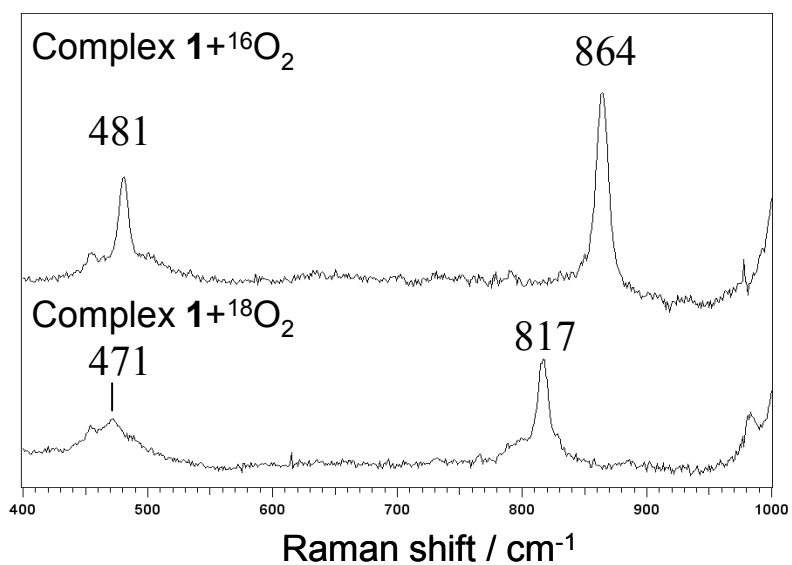

**Figure S3.** Resonance Raman spectra of the reaction solution of **1** with  $\text{O}_2$  in MeOH.

(top) reaction of **1** with  $^{16}\text{O}_2$

$$\nu(\text{Cu}-^{16}\text{O}) = 481 \text{ cm}^{-1}, \nu(^{16}\text{O}-^{16}\text{O}) = 861 \text{ cm}^{-1}$$

(bottom) reaction of **1** with  $^{18}\text{O}_2$

$$\nu(\text{Cu}-^{18}\text{O}) = 471 \text{ cm}^{-1}, \nu(^{18}\text{O}-^{18}\text{O}) = 817 \text{ cm}^{-1}$$

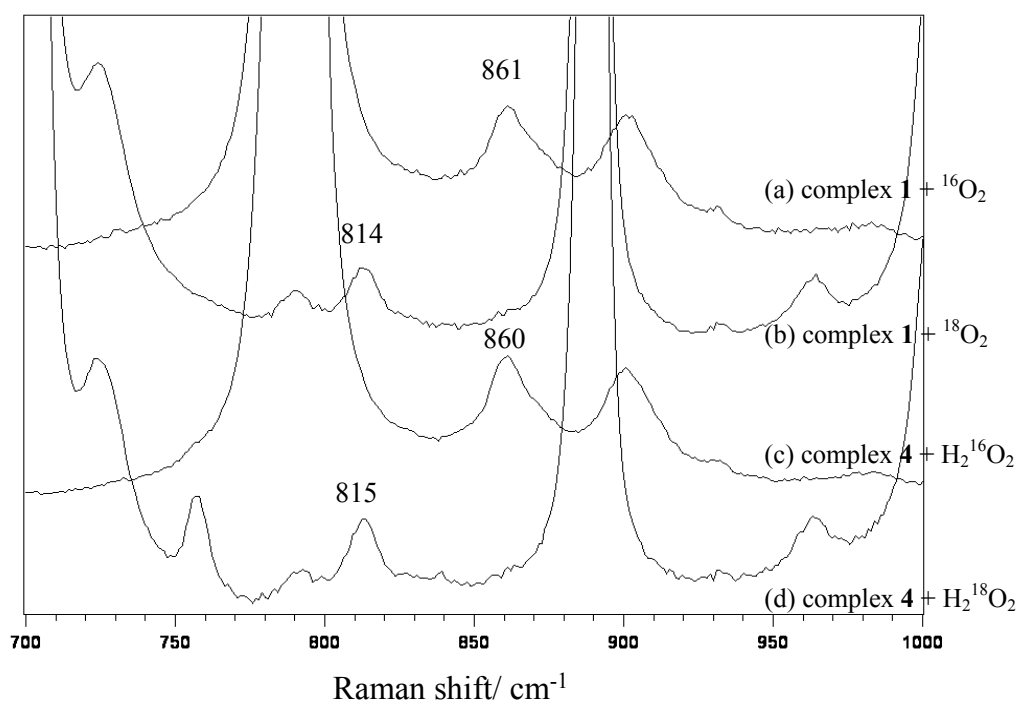

**Figure S4.** Comparison of resonance Raman spectra of the reaction of ( **1** + O<sub>2</sub> ) system with that of ( [Cu<sup>II</sup>(Hbppa)]<sup>+</sup> + H<sub>2</sub>O<sub>2</sub> ) system.

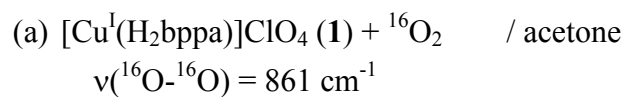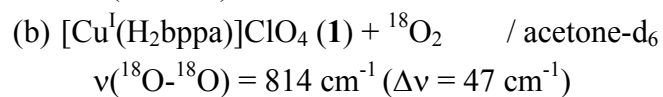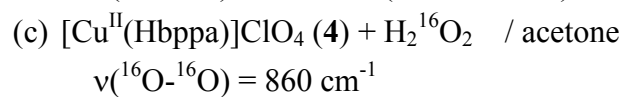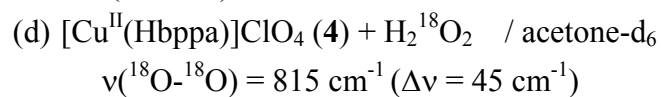

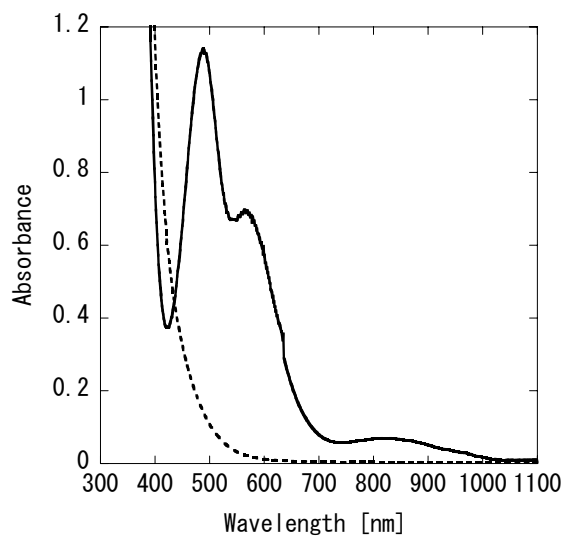

Figure S5. UV-vis spectral change in the reaction of **1** with O<sub>2</sub> in the presence of a large amount of DMPO.

(dotted line) **1** (1 mM) + DMPO (40 mM) / MeOH

(solid line) O<sub>2</sub> bubbling at -78 °C

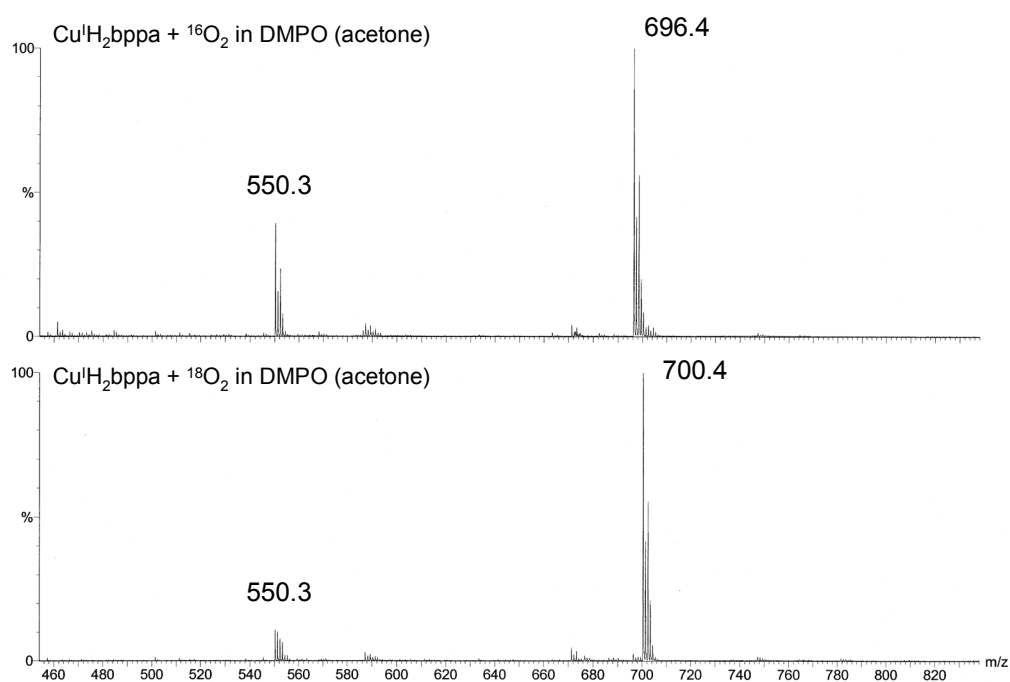

**Figure S6(a).** ESI-mass spectra of the reaction solution of **1** with  $O_2$  in the presence of a large amount of DMPO.

(top) reaction of **1** +  $^{16}O_2$

$m/z = 550.3 : [Cu^{II}(Hbppa)]^+$ ,  $696.4 : [Cu^{II}(H_2bppa)(^{16}O_2^-)(DMPO)]^+$

(bottom) reaction of **1** +  $^{18}O_2$

$m/z = 550.3 : [Cu^{II}(Hbppa)]^+$ ,  $700.4 : [Cu^{II}(H_2bppa)(^{18}O_2^-)(DMPO)]^+$

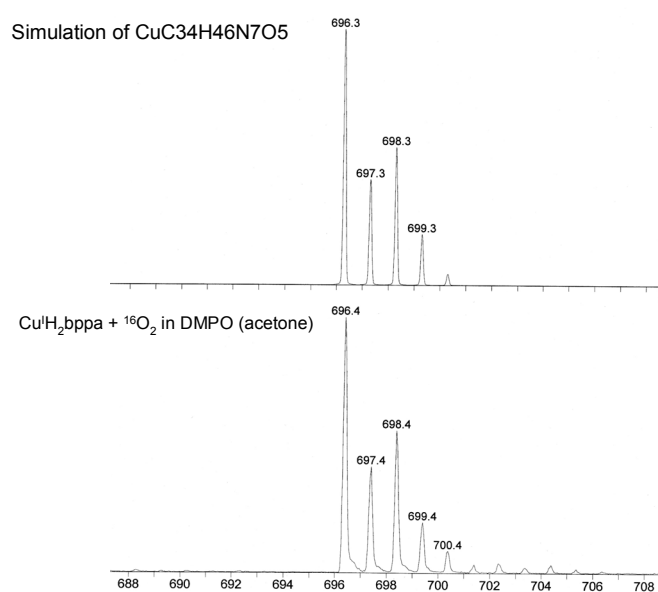

**Figure S6(b).** Comparison of the ESI-mass spectra of **1** +  $^{16}O_2$  and isotopic simulation.



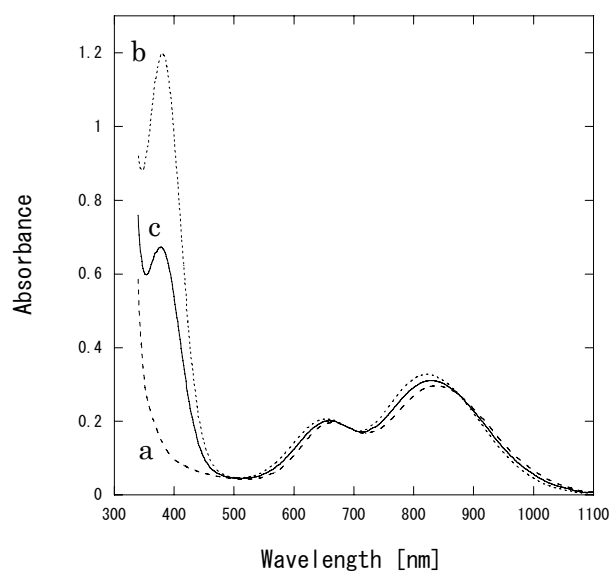

**Figure S7.** Simulation of spectrum of the reaction mixture after reaction of **1** with  $O_2$ . Spectrum **c** is the sum of the spectra **3** (spectrum **b**) and **4** (spectrum **a**) which is good agreement with the spectrum after reaction of **1** with  $O_2$ . It makes reasonable to consider that the mass balance is about 1:1 (complex **3** : complex **4**) after reaction of **1** with  $O_2$ .
